# Supplementary material
Source: PubMed Central journal article supplement (PMC3085087)
Supplement: NIHMS260006-supplement-01.pdf [file NIHMS260006-supplement-01.pdf]

# Economic Analysis of Physical Activity Interventions

Shinyi Wu, PhD, Deborah Cohen, MD, MPH, Yuyan Shi, MA, Marjorie Pearson, PhD,  
Roland Sturm, PhD

## Appendix A

### Summary of interventions included in the analysis

| Study, design, country                            | Number and type of population reached /observed; % male | Intervention description                                                                                                                                                                          | Intervention duration; follow-up length | Reported measure                       | Measurement instrument                                        | MET hours gained per person per day; total population benefit in a year in a population of 10,000 (METs) | Total estimated intervention cost (\$2006); total cost / year in 10,000 population (\$) | Cost-effective-ness ratio (estimated \$/MET hour gained) | Study quality rating total score <sup>a</sup> |
|---------------------------------------------------|---------------------------------------------------------|---------------------------------------------------------------------------------------------------------------------------------------------------------------------------------------------------|-----------------------------------------|----------------------------------------|---------------------------------------------------------------|----------------------------------------------------------------------------------------------------------|-----------------------------------------------------------------------------------------|----------------------------------------------------------|-----------------------------------------------|
| <b>Community-wide health education campaign</b>   |                                                         |                                                                                                                                                                                                   |                                         |                                        |                                                               |                                                                                                          |                                                                                         |                                                          |                                               |
| Bauman (2003), <sup>1</sup> pre-post, New Zealand | 100,000 community adults; 50.2                          | Media-led, community-wide physical activity campaign                                                                                                                                              | 12 months; 12 months                    | % of people meeting guidelines         | Subjects self-report number of days being active in past week | 0.10; 361,350                                                                                            | 456,300; 4,563                                                                          | 0.01                                                     | 5                                             |
| DeCocker (2007), <sup>2</sup> RCT/CT, Belgium     | 228,000 community adults; 47.2                          | Local media campaign, environmental approaches, the sale and loan of pedometers, and several local physical activity projects                                                                     | 12 months; 12 months                    | Pedometer counts/day                   | OBI and SUI: pedometers and self-report IPAQ questionnaire    | 0.44; 1,599,339                                                                                          | 32,643; 1,432                                                                           | 0.001                                                    | 6                                             |
| Reger (2002), <sup>3</sup> (RCT/CT), U.S.         | 3142 community adults; 32.5                             | Community campaign including paid advertisement, public relations activities, worksite programs, website exposure, physician prescription for walking, and other public health education programs | 2 months; 2 months                      | % of people meeting guidelines         | SUI: telephone survey                                         | 0.48; 1,762,950                                                                                          | 175,500; 3,351,369                                                                      | 1.90                                                     | 4                                             |
| Wen (2002), <sup>4</sup> pre-post, Australia      | 20,000 adults; 0                                        | Community-based multi-strategic health promotion in collaboration with local government: including a local social-marketing campaign and physical capacity building                               | 24 months; 24 months                    | Hours spent on walking in past 2 weeks | SUI: past 2-week self-report                                  | 0.01; 49,764                                                                                             | 298,620; 74,655                                                                         | 1.50                                                     | 2                                             |

| Study, design, country                         | Number and type of population reached /observed; % male | Intervention description                                                                 | Intervention duration; follow-up length | Reported measure      | Measurement instrument           | MET hours gained per person per day; total population benefit in a year in a population of 10,000 (METs) | Total estimated intervention cost (\$2006); total cost / year in 10,000 population (\$) | Cost-effective-ness ratio (estimated \$/MET hour gained) | Study quality rating total score <sup>a</sup> |
|------------------------------------------------|---------------------------------------------------------|------------------------------------------------------------------------------------------|-----------------------------------------|-----------------------|----------------------------------|----------------------------------------------------------------------------------------------------------|-----------------------------------------------------------------------------------------|----------------------------------------------------------|-----------------------------------------------|
| <b>Point of decision prompts</b>               |                                                         |                                                                                          |                                         |                       |                                  |                                                                                                          |                                                                                         |                                                          |                                               |
| Andersen (1998), <sup>5</sup> pre-post, U.S.   | 5967 community residents; 40.9                          | Stair-use sign to encourage stair use (benefit sign)                                     | 1 month; 1 month                        | % change in stair use | OBI: Step-use direct observation | 0.0019; 6813                                                                                             | 58; 58                                                                                  | 0.171                                                    | 3                                             |
|                                                | 5967 community residents; 40.4                          | Stair-use sign to encourage stair use (weight-control sign)                              | 1 month; 1 month                        | % change in stair use | OBI: Step-use direct observation | 0.0021; 7787                                                                                             | 58; 58                                                                                  | 0.149                                                    | 3                                             |
| Auweele (2005), <sup>6</sup> pre-post, Belgium | 1475 employees; 0                                       | Health sign that linked stair use to health and fitness                                  | 1 week; 1 week                          | % change in stair use | OBI: Step-use direct observation | 0.0071; 14,222                                                                                           | 152; 1032                                                                               | 2.903                                                    | 3                                             |
|                                                | 1475 employees, 0                                       | Health sign followed by e-mail sent by doctor pointing out health benefits of stair use  | 1 week; 1 week                          | % change in stair use | OBI: Step-use direct observation | 0.0142; 28,444                                                                                           | 257; 1744                                                                               | 2.453                                                    | 3                                             |
| Blamey (1995), <sup>7</sup> pre-post, Scotland | 61,867 community residents                              | Stair-use motivational sign                                                              | 3 weeks; 3 weeks                        | % change in stair use | OBI: Step-use direct observation | 0.0071; 14,222                                                                                           | 58; 58                                                                                  | 0.009                                                    | 3                                             |
| Boutelle (2004), <sup>8</sup> pre-post, U.S.   | 47,300 employees                                        | Stair-use sign to encourage stair use                                                    | 1 month; 1 month                        | % change in stair use | OBI: Step-use direct observation | 0.0010; 1956                                                                                             | 58; 58                                                                                  | 0.062                                                    | 3                                             |
|                                                | 47,300 employees                                        | Stair-use sign plus music and artwork                                                    | 1 month; 1 month and 2 months           | % change in stair use | OBI: Step-use direct observation | 0.0017; 3300                                                                                             | 688; 688                                                                                | 0.220                                                    | 3                                             |
| Coleman (2001), <sup>9</sup> pre-post, U.S.    | 40,216 community residents; 48.8                        | Culturally relevant individual health message to improve stair use in a bank setting     | 1 month; 1 month and 2 months           | % change in stair use | OBI: Step-use direct observation | 0.0025; 9219                                                                                             | 58; 58                                                                                  | 0.028                                                    | 3                                             |
|                                                | 511,920 community residents; 48.8                       | Culturally relevant individual health message to improve stair use in an airport setting | 1 month; 1 month and 2 months           | % change in stair use | OBI: Step-use direct observation | 0.0008; 2769                                                                                             | 58; 58                                                                                  | 0.005                                                    | 3                                             |

| Study, design, country                  | Number and type of population reached /observed; % male | Intervention description                                                                     | Intervention duration; follow-up length | Reported measure      | Measurement instrument           | MET hours gained per person per day; total population benefit in a year in a population of 10,000 (METs) | Total estimated intervention cost (\$2006); total cost / year in 10,000 population (\$) | Cost-effective-ness ratio (estimated \$/MET hour gained) | Study quality rating total score <sup>a</sup> |
|-----------------------------------------|---------------------------------------------------------|----------------------------------------------------------------------------------------------|-----------------------------------------|-----------------------|----------------------------------|----------------------------------------------------------------------------------------------------------|-----------------------------------------------------------------------------------------|----------------------------------------------------------|-----------------------------------------------|
|                                         | 570,240 community residents; 48.8                       | Culturally relevant family health message to improve stair use in an airport setting         | 1 month; 1 month and 2 months           | % change in stair use | OBI: Step-use direct observation | 0.0020; 7384                                                                                             | 79; 79                                                                                  | 0.002                                                    | 3                                             |
|                                         | 60,293 community residents; 48.8                        | Culturally relevant family health message to improve stair use in a library setting          | 1 month; 1 month and 2 months           | % change in stair use | OBI: Step-use direct observation | 0.0008; 2806                                                                                             | 79; 79                                                                                  | 0.085                                                    | 3                                             |
|                                         | 16,095 community residents; 48.8                        | Culturally relevant family health message to improve stair use in an office building setting | 1 month; 2 months                       | % change in stair use | OBI: Step-use direct observation | 0.0008; 2962                                                                                             | 79; 79                                                                                  | 0.151                                                    | 3                                             |
| Kerr (2001), <sup>10</sup> pre-post, UK | 155,301 community residents                             | Eight stair-promotion messages on alternate stair risers                                     | 1.5 months; 1.5 months                  | % change in stair use | OBI: Step-use direct observation | 0.0091; 33,093                                                                                           | 278; 278                                                                                | 0.004                                                    | 3                                             |
| Kerr (2001), <sup>11</sup> pre-post, UK | 75,054 community residents                              | A-2 size poster                                                                              | 2 weeks; 2 weeks                        | % change in stair use | OBI: Step-use direct observation | 0.008; 2920                                                                                              | 58; 58                                                                                  | 0.063                                                    | 3                                             |
|                                         | 75,054 community residents                              | A-1 size poster                                                                              | 2 weeks; 2 weeks                        | % change in stair use | OBI: Step-use direct observation | 0.0015; 5516                                                                                             | 58; 58                                                                                  | 0.033                                                    | 3                                             |
|                                         | 59,077 community residents                              | A-1 size poster that read “stay healthy, use the stairs”—in train station                    | 2 weeks; 2 weeks                        | % change in stair use | OBI: Step-use direct observation | 0.0034; 12,329                                                                                           | 58; 58                                                                                  | 0.019                                                    | 3                                             |
|                                         | 59,077 community residents                              | A-1 size poster that read “stay healthy, save time, use the stairs”—in train station         | 2 weeks; 2 weeks                        | % change in stair use | OBI: Step-use direct observation | 0.0068; 24,658                                                                                           | 58; 58                                                                                  | 0.010                                                    | 3                                             |
|                                         | 29,372 community residents                              | A-1 size poster that read “stay healthy, use the stairs”—in shopping center                  | 2 weeks; 2 weeks                        | % change in stair use | OBI: Step-use direct observation | 0.0032; 11,680                                                                                           | 58; 58                                                                                  | 0.040                                                    | 3                                             |
|                                         | 29,372 community residents                              | A-1 size poster that read “stay healthy, save time, use the stairs”—in shopping center       | 2 weeks; 2 weeks                        | % change in stair use | OBI: Step-use direct observation | 0.0026; 9409                                                                                             | 58; 58                                                                                  | 0.050                                                    | 3                                             |

| Study, design, country                             | Number and type of population reached /observed; % male | Intervention description                                                   | Intervention duration; follow-up length | Reported measure      | Measurement instrument                        | MET hours gained per person per day; total population benefit in a year in a population of 10,000 (METs) | Total estimated intervention cost (\$2006); total cost / year in 10,000 population (\$) | Cost-effective-ness ratio (estimated \$/MET hour gained) | Study quality rating total score <sup>a</sup> |
|----------------------------------------------------|---------------------------------------------------------|----------------------------------------------------------------------------|-----------------------------------------|-----------------------|-----------------------------------------------|----------------------------------------------------------------------------------------------------------|-----------------------------------------------------------------------------------------|----------------------------------------------------------|-----------------------------------------------|
| Kerr (2004), <sup>12</sup> pre-post, U.S.          | 664 employees; 25.8                                     | Adding framed artwork on stair landings                                    | 38 months; 3 and 38 months              | % change in stair use | OBI: Beam sensors count                       | 0.0045; 8954                                                                                             | 893; 13,441                                                                             | 1.876                                                    | 3                                             |
|                                                    | 664 employees; 25.8                                     | Displaying motivational signs throughout the building                      | 27 months; 3 and 27 months              | % change in stair use | OBI: Beam sensors count                       | 0.0045; 8994                                                                                             | 158; 2372                                                                               | 0.138                                                    | 3                                             |
|                                                    | 664 employees; 25.8                                     | Adding a stereo system and playing various types of music in the stairwell | 4 months; 3 and 4 months                | % change in stair use | OBI: Beam sensors count                       | 0.0122; 24,366                                                                                           | 578; 8697                                                                               | 0.992                                                    | 3                                             |
| Marshall (2002), <sup>13</sup> pre-post, Australia | 26,391 community residents                              | Stair-use sign to encourage stair use                                      | 2 weeks; 2 weeks                        | % change in stair use | OBI: Direct observation by unobtrusive device | 0.0007; 2596                                                                                             | 58; 58                                                                                  | 0.202                                                    | 3                                             |
| Russell (1999), <sup>14</sup> pre-post, U.S.       | 16,244 community residents; 57.0                        | Health-promotion sign to encourage stair use                               | 11 weeks; 11 weeks                      | % change in stair use | OBI: Step-use direct observation              | 0.0020; 3911                                                                                             | 58; 58                                                                                  | 0.033                                                    | 3                                             |
| Russell (2000), <sup>15</sup> pre-post, U.S.       | 3370 community residents                                | Health-promotion sign to encourage stair use                               | 1 week; 1 week                          | % change in stair use | OBI: Step-use direct observation              | 0.0059; 21,640                                                                                           | 58; 58                                                                                  | 0.380                                                    | 3                                             |
|                                                    | 3370 community residents                                | Deterrent sign                                                             | 1 week; 1 week                          | % change in stair use | OBI: Step-use direct observation              | 0.0055; 20,051                                                                                           | 58; 58                                                                                  | 0.624                                                    | 3                                             |
| Webb (2005), <sup>16</sup> pre-post, UK            | 96,060 community residents; 46.0                        | Single stair-use sign                                                      | 2 weeks; 2 weeks                        | % change in stair use | OBI: Step-use direct observation              | 0.0064; 23,360                                                                                           | 373; 373                                                                                | 0.040                                                    | 3                                             |
|                                                    | 96,060 community residents; 46.0                        | Multiple stair-use signs                                                   | 2 weeks; 2 weeks                        | % change in stair use | OBI: Step-use direct observation              | 0.0059; 21,413                                                                                           | 278; 278                                                                                | 0.032                                                    | 3                                             |

| Study, design, country                                | Number and type of population reached /observed; % male | Intervention description                                                                                                                                                              | Intervention duration; follow-up length | Reported measure                         | Measurement instrument                                                                                       | MET hours gained per person per day; total population benefit in a year in a population of 10,000 (METs) | Total estimated intervention cost (\$2006); total cost / year in 10,000 population (\$) | Cost-effective-ness ratio (estimated \$/MET hour gained) | Study quality rating total score <sup>a</sup> |
|-------------------------------------------------------|---------------------------------------------------------|---------------------------------------------------------------------------------------------------------------------------------------------------------------------------------------|-----------------------------------------|------------------------------------------|--------------------------------------------------------------------------------------------------------------|----------------------------------------------------------------------------------------------------------|-----------------------------------------------------------------------------------------|----------------------------------------------------------|-----------------------------------------------|
| <b>Individually adapted behavior change</b>           |                                                         |                                                                                                                                                                                       |                                         |                                          |                                                                                                              |                                                                                                          |                                                                                         |                                                          |                                               |
| Aittasalo (2006), <sup>17</sup><br>RCT/CT,<br>Finland | 62 adult patients;<br>23.0                              | Physical activity self-monitoring using pedometer and physical activity log for 5 consecutive days                                                                                    | 1 week;<br>2 months                     | Minutes/<br>week of<br>MVPA              | SUI: Self-report short version of IPAQ Questionnaire                                                         | 0.18;<br>664,821                                                                                         | 3,427;<br>6,632,903                                                                     | 5.95                                                     | 8                                             |
|                                                       | 130 adult patients;<br>25.0                             | Physician individual counseling (one time)                                                                                                                                            | One time;<br>2 and 6 months             | Minutes/<br>week of<br>MVPA              | SUI: Self-report short version of IPAQ Questionnaire                                                         | 0.28;<br>1,016,786                                                                                       | 8,334;<br>7,692,969                                                                     | 1.71                                                     | 8                                             |
| Arao (2007), <sup>18</sup><br>RCT/CT<br>Japan         | 84 adults                                               | Individual counseling for 15 minutes at the goal-setting session and 5 monthly sessions of individual consultations for 10 minutes, plus environmental and social support             | 6 months;<br>6 months                   | kcal/week<br>on MVPA                     | SUI: Self-report. Assessed by Kuopio Ischemic Heart Disease Risk Factor Study, modified from Japanese        | 0.82;<br>2,984,061                                                                                       | 8,073;<br>1,922,143                                                                     | 0.70                                                     | 6                                             |
| Bock (2001), <sup>19</sup><br>pre-post,<br>U.S.       | 97 sedentary people;<br>23.7                            | Motivation-matched intervention with feedback reports that were individually tailored                                                                                                 | 6 months;<br>6 and 12 months            | Minutes/<br>week of<br>physical activity | SUI: Self-report 7-day PDPAR                                                                                 | 1.26;<br>4,585,964                                                                                       | 8,924;<br>1,840,000                                                                     | 0.32                                                     | 5                                             |
|                                                       | 97 sedentary people;<br>23.7                            | Standard, print-based intervention using self-help booklets                                                                                                                           | 6 months;<br>6 and 12 months            | Minutes/<br>week of<br>physical activity | SUI: Self-report 7-day PDPAR                                                                                 | 0.78;<br>2,849,607                                                                                       | 2,231;<br>460,000                                                                       | 0.13                                                     | 5                                             |
| Chan (2004), <sup>20</sup><br>pre-post,<br>Canada     | 177 worksite workers;<br>13.2                           | Participants met in workplace-based groups with a facilitator for 30–60 minutes each week for 4 weeks to set goals and self-monitor steps, and continued self-monitoring for 8 weeks. | 3 months;<br>3 months                   | Walking<br>steps/day                     | OBI: Pedometer counts                                                                                        | 1.47;<br>5,353,364                                                                                       | 12,892;<br>2,913,333                                                                    | 0.91                                                     | 2                                             |
| Chen (1998), <sup>21</sup><br>pre-post,<br>U.S.       | 62 sedentary, ethnic minority adults;<br>0              | Behavioral condition: behavior change materials through mail and six structured telephone-counseling sessions                                                                         | 2 months;<br>2, 5, and<br>30 months     | Minutes/<br>week of<br>walking           | SUI and OBI: Self-report past 2-week walking activity. Accelerometers were used in subsample, not effective. | 0.22;<br>800,393                                                                                         | 4,963;<br>4,802,845                                                                     | 0.40                                                     | 3                                             |

| Study, design, country                                     | Number and type of population reached /observed; % male | Intervention description                                                                                                                                                                              | Intervention duration; follow-up length | Reported measure                                       | Measurement instrument                                                                                       | MET hours gained per person per day; total population benefit in a year in a population of 10,000 (METs) | Total estimated intervention cost (\$2006); total cost / year in 10,000 population (\$) | Cost-effective-ness ratio (estimated \$/MET hour gained) | Study quality rating total score <sup>a</sup> |
|------------------------------------------------------------|---------------------------------------------------------|-------------------------------------------------------------------------------------------------------------------------------------------------------------------------------------------------------|-----------------------------------------|--------------------------------------------------------|--------------------------------------------------------------------------------------------------------------|----------------------------------------------------------------------------------------------------------|-----------------------------------------------------------------------------------------|----------------------------------------------------------|-----------------------------------------------|
|                                                            | 63 sedentary, ethnic minority adults; 0                 | Educational condition: single 5-minute telephone call and educational information                                                                                                                     | One time; 2, 5, and 30 months           | Minutes /week of walking                               | SUI and OBI: Self-report past 2-week walking activity. Accelerometers were used in subsample, not effective. | 0.29; 1,061,107                                                                                          | 581; 1,106,957                                                                          | 0.03                                                     | 3                                             |
| Croteau (2007), <sup>22</sup> RCT/CT, U.S.                 | 95 community older residents                            | Self-monitored pedometer-based intervention: individuals met with a facilitator to set pedometer goals, select strategies, review pedometer usage, and discuss procedures for keeping a step calendar | 3 months; 3 months                      | Walking steps/day                                      | OBI: Pedometer counts                                                                                        | 0.44; 1,600,890                                                                                          | 3278; 1,380,000                                                                         | 1.01                                                     | 5                                             |
| Elley (2003), <sup>23</sup> RCT/CT, New Zealand            | 34,708 sedentary adults; 67.0                           | Clinician-based initiative in general practice that provides counseling on physical activity; exercise specialists continued support with at least three telephone calls and quarterly newsletters    | 12 months; 12 months                    | kcal/kg/week on leisure-time MVPA                      | SUI: Self-report. Last 3-month recall                                                                        | 0.38; 1,392,214                                                                                          | 2,764,804; 796,590                                                                      | 0.57                                                     | 6                                             |
| Green (2007), <sup>24</sup> pre-post, U.S.                 | 1157 worksite workers; 14.0                             | Active for Life intervention: goal-setting, self-monitoring using pedometers, incentives, and team competition                                                                                        | 2.5 months; 2.5 months                  | MET hours/week                                         | SUI: Self-report Godin Weekly Leisure-Time Exercise Questionnaire                                            | 0.34; 1,238,393                                                                                          | 40,631; 1,685,653                                                                       | 2.79                                                     | 4                                             |
| Halbert (2000), <sup>25</sup> RCT/CT, Australia            | 149 seniors; 48.0                                       | 20-minute individualized physical activity advice by an exercise specialist in general practice, reinforced at 3 and 8 months                                                                         | 6 months; 3, 6, and 12 months           | Median minutes spent on walking and VPA /week          | SUI: Past 7-day physical activity log                                                                        | 0.79; 2,867,857                                                                                          | 4771; 640,450                                                                           | 0.14                                                     | 8                                             |
| Harrison (2005), <sup>26</sup> post measure comparison, UK | 275 sedentary adults; 32.7                              | Referral to a local-authority exercise referral scheme with free 12-week leisure pass and written information plus individual tailored counseling (1-hour session)                                    | One time; 6 months                      | % people participating in ≥90 minutes of MVPA per week | SUI: 7-day PDPAR                                                                                             | 0.09; 316,768                                                                                            | 13,441; 5,865,000                                                                       | 5.05                                                     | 5                                             |

| Study, design, country                            | Number and type of population reached /observed; % male | Intervention description                                                                                                                                                                       | Intervention duration; follow-up length | Reported measure                  | Measurement instrument                                                                     | MET hours gained per person per day; total population benefit in a year in a population of 10,000 (METs) | Total estimated intervention cost (\$2006); total cost / year in 10,000 population (\$) | Cost-effective-ness ratio (estimated \$/MET hour gained) | Study quality rating total score <sup>a</sup> |
|---------------------------------------------------|---------------------------------------------------------|------------------------------------------------------------------------------------------------------------------------------------------------------------------------------------------------|-----------------------------------------|-----------------------------------|--------------------------------------------------------------------------------------------|----------------------------------------------------------------------------------------------------------|-----------------------------------------------------------------------------------------|----------------------------------------------------------|-----------------------------------------------|
| Jimmy (2005), <sup>27</sup> pre-post, Switzerland | 92 sedentary adults; 42.0                               | Feedback group: given feedback from their physician concerning their physical activity level                                                                                                   | One time; 7 weeks and 14 months         | % of people meeting guidelines    | SUI: 7-day PDPAR                                                                           | 0.71; 2,573,250                                                                                          | 8,386; 10,938,000                                                                       | 0.36                                                     | 5                                             |
|                                                   | 69 sedentary adults; 43.0                               | Feedback plus group: given feedback from their physician concerning their physical activity level and received further advice and stage-matched leaflets and were offered 45-minute counseling | 3 months; 7 weeks and 14 months         | % of people meeting guidelines    | SUI: 7-day PDPAR                                                                           | 0.71; 2,573,250                                                                                          | 15,732; 9,120,167                                                                       | 0.95                                                     | 5                                             |
| King (2007), <sup>28</sup> RCT/CT, U.S.           | 73 sedentary adults; 29.5                               | Human advice arm: telephone-assisted physical activity counseling by a trained health educator                                                                                                 | 12 months; 6 and 12 months              | kcal/kg/day                       | SUI and OBI: 7-day PDPAR and CHAMPS supplemented by accelerometer. 7-day PAR is used here. | 0.53; 1,934,500                                                                                          | 20,294; 2,780,007                                                                       | 1.59                                                     | 5                                             |
|                                                   | 75 sedentary adults; 30.3                               | Automated advice arm: telephone-assisted physical activity counseling by an automated telephone-linked computer system                                                                         | 12 months; 6 and 12 months              | kcal/kg/day                       | SUI and OBI: 7-day PDPAR and CHAMPS supplemented by accelerometer. 7-day PAR is used here. | 0.50; 1,825,000                                                                                          | 5119; 682,500                                                                           | 0.46                                                     | 5                                             |
| Kolt (2007) <sup>29</sup> RCT/CT, New Zealand     | 93 sedentary seniors; 42.0                              | Eight telephone-counseling sessions on physical activity                                                                                                                                       | 3 months; 3, 6, and 12 months           | Minutes/week of leisure-time MVPA | SUI: Self-report Auckland Heart Study Physical Activity Questionnaire.                     | 0.59; 2,143,071                                                                                          | 5,578; 2,398,925                                                                        | 0.31                                                     | 8                                             |
| Logue (2005) <sup>30</sup> pre-post, U.S.         | 336 obese adults; 33.0                                  | Dietary and exercise advice, and three 24-hour dietary recalls every 6 months                                                                                                                  | 24 months; 6, 12, 18, and 24 months     | Minutes/week of exercise          | SUI: Stanford 7-day recall                                                                 | 0.32; 1,173,214                                                                                          | 13,179; 196,116                                                                         | 0.27                                                     | 3                                             |

| Study, design, country                           | Number and type of population reached /observed; % male | Intervention description                                                                                                                                                                                           | Intervention duration; follow-up length | Reported measure                  | Measurement instrument              | MET hours gained per person per day; total population benefit in a year in a population of 10,000 (METs) | Total estimated intervention cost (\$2006); total cost / year in 10,000 population (\$) | Cost-effective-ness ratio (estimated \$/MET hour gained) | Study quality rating total score <sup>a</sup> |
|--------------------------------------------------|---------------------------------------------------------|--------------------------------------------------------------------------------------------------------------------------------------------------------------------------------------------------------------------|-----------------------------------------|-----------------------------------|-------------------------------------|----------------------------------------------------------------------------------------------------------|-----------------------------------------------------------------------------------------|----------------------------------------------------------|-----------------------------------------------|
|                                                  | 329 obese adults; 30.0                                  | Dietary and exercise advice, three 24-hour dietary recalls every 6 months, plus stage-of-change assessments for five target behaviors every other month, workbooks, and monthly phone calls for weight-loss advice | 24 months; 6, 12, 18, and 24 months     | Minutes/week of exercise          | SUI: Stanford 7-day recall          | 0.64; 2,346,429                                                                                          | 45,322; 688,777                                                                         | 0.43                                                     | 3                                             |
| Marcus (1998), <sup>31</sup> pre-post, U.S.      | 97 sedentary adults; 23.7                               | Individual tailored intervention: computer expert system and self-help manuals                                                                                                                                     | 6 months; 6 months                      | Minutes/week of physical activity | SUI: 7-day PDPAR                    | 1.04; 3,803,821                                                                                          | 1124; 231,649                                                                           | 0.08                                                     | 4                                             |
|                                                  | 97 sedentary adults; 23.7                               | Standard intervention: self-help booklets                                                                                                                                                                          | 6 months; 6 months                      | Minutes/week of physical activity | SUI: 7-day PDPAR                    | 0.55; 2,023,143                                                                                          | 1019; 210,000                                                                           | 0.14                                                     | 4                                             |
| Marcus (2007), <sup>32</sup> RCT/CT, U.S.        | 81 sedentary adults; 15.0                               | Telephone counseling (14 contacts over 12 months): receiving individual tailored messages, booklets, and physical activity tip sheets                                                                              | 12 months; 6 and 12 months              | Minutes/week on physical activity | SUI: 7-day PDPAR                    | 0.20; 714,879                                                                                            | 34,181; 4,219,911                                                                       | 7.25                                                     | 6                                             |
|                                                  | 80 sedentary adults; 24.7                               | Print feedback: receiving individual tailored messages, booklets, and physical activity tip sheets                                                                                                                 | 12 months; 6 and 12 months              | Minutes/week on physical activity | SUI: 7-day PDPAR                    | 0.85; 3,113,711                                                                                          | 21,977; 2,747,080                                                                       | 1.01                                                     | 6                                             |
| Marshall (2003), <sup>33</sup> RCT/CT, Australia | 227 adults; 47.0                                        | Mailed stage-targeted print intervention, consisted of a single mailing of a letter and full-color stage-targeted booklets                                                                                         | One time; 2 and 6 months                | Hours/week of MVPA                | SUI: 2-week PDPAR                   | 0.21; 782,143                                                                                            | 1192; 630,000                                                                           | 0.17                                                     | 7                                             |
| Mayer (1994), <sup>34</sup> RCT/CT, U.S.         | 899 sedentary seniors; 43.5                             | Goal-setting and 15-minute individualized face-to-face counseling session based on a health-risk appraisal and a series of 8-week educational sessions                                                             | 2 months; 12 months                     | MET minutes/week                  | SUI : Self-report HRA questionnaire | 0.20; 719,658                                                                                            | 58,256; 3,888,070                                                                       | 0.90                                                     | 8                                             |
| Napolitano (2006), <sup>35</sup> pre-post, U.S.  | 95 adults; 0                                            | Jumpstart: individual tailored feedback generated by expert system computer software and booklet targeted on stage of change                                                                                       | 3 months; 3 and 12 months               | Minutes/week of MVPA              | SUI: 7-day PDPAR                    | 1.07; 3,922,446                                                                                          | 1604; 675,474                                                                           | 0.06                                                     | 5                                             |
|                                                  | 93 adults; 0                                            | Choose to move: mailing booklets and 12-week educational program                                                                                                                                                   | 6 months; 3 and 12 months               | Minutes/week of MVPA              | SUI: 7-day PDPAR                    | 1.11; 4,060,495                                                                                          | 661; 142,204                                                                            | 0.02                                                     | 5                                             |



| Study, design, country                             | Number and type of population reached /observed; % male | Intervention description                                                                                                                                                                                                 | Intervention duration; follow-up length | Reported measure                              | Measurement instrument                                                                                          | MET hours gained per person per day; total population benefit in a year in a population of 10,000 (METs) | Total estimated intervention cost (\$2006); total cost / year in 10,000 population (\$) | Cost-effective-ness ratio (estimated \$/MET hour gained) | Study quality rating total score <sup>a</sup> |
|----------------------------------------------------|---------------------------------------------------------|--------------------------------------------------------------------------------------------------------------------------------------------------------------------------------------------------------------------------|-----------------------------------------|-----------------------------------------------|-----------------------------------------------------------------------------------------------------------------|----------------------------------------------------------------------------------------------------------|-----------------------------------------------------------------------------------------|----------------------------------------------------------|-----------------------------------------------|
|                                                    | 92 adults; 0                                            | One-time mailing information                                                                                                                                                                                             | One time; 3 and 12 months               | Minutes/week of MVPA                          | SUI: 7-day PDPAR                                                                                                | 1.13; 4,142,229                                                                                          | 529; 690,000                                                                            | 0.02                                                     | 5                                             |
| Nies (2003), <sup>36</sup> RCT/CT, U.S.            | 67 sedentary women; 0                                   | Telephone physical activity counseling once a week for the first 8 weeks and every other week for the remaining 16 weeks                                                                                                 | 6 months; 6 months                      | Minutes/day of walking                        | SUI: Self-report average minutes walking per day                                                                | 0.23; 834,025                                                                                            | 7849; 2,342,910                                                                         | 3.49                                                     | 3                                             |
| Nies (2006), <sup>37</sup> pre-post, U.S.          | 90 sedentary women; 0                                   | Telephone calls with counseling (one call every week for 8 weeks and every other week for next 16 weeks for a total of 16 calls, 15 minutes each time)                                                                   | 6 months; 6 and 12 months               | Minutes/week of walking                       | SUI: 7-day PDPAR                                                                                                | 0.20; 734,693                                                                                            | 6463; 1,436,222                                                                         | 1.21                                                     | 5                                             |
|                                                    | 80 sedentary women; 0                                   | Brief telephone calls (16 calls over 24 weeks, 2-5 minutes each time) without counseling                                                                                                                                 | 6 months; 6 and 12 months               | Minutes/week of walking                       | SUI: 7-day PDPAR                                                                                                | 0.18; 646,050                                                                                            | 1725; 431,250                                                                           | 0.41                                                     | 5                                             |
|                                                    | 83 sedentary women; 0                                   | 20-minute video education                                                                                                                                                                                                | One time; 6 and 12 months               | Minutes/week of walking                       | SUI: 7-day PDPAR                                                                                                | 0.23; 851,232                                                                                            | 115; 166,265                                                                            | 0.02                                                     | 5                                             |
| Ortega-Sanchez (2004), <sup>38</sup> RCT/CT, Spain | 222 adolescents; 58.3                                   | Physician advice on physical activity provided in office 5-11 minutes (at the beginning of study and 1 year after)                                                                                                       | 12 months; 6 and 12 months              | Minutes/week of any physical activity         | SUI: Self-report in physician office. Physical education class and exercise duration and frequency were asked   | 0.61; 2,213,464                                                                                          | 9689; 436,430                                                                           | 0.22                                                     | 5                                             |
| Patrick (2006), <sup>39</sup> RCT/CT, U.S.         | 224 adolescents; 100                                    | Primary care, office-based, computer-assisted diet and physical activity assessment and stage-based goal-setting followed by brief healthcare provider counseling and 12 months of monthly mail and telephone counseling | 12 months; 12 months                    | Active days (at least 3.0 MET hours) per week | SUI and OBI: 7-day PDPAR is used. Accelerometer is a secondary measure because of large amounts of missing data | 0.13; 469,286                                                                                            | 36,570; 1,632,589                                                                       | 5.13                                                     | 6                                             |

| Study, design, country                              | Number and type of population reached /observed; % male | Intervention description                                                                                                    | Intervention duration; follow-up length | Reported measure            | Measurement instrument                                                                     | MET hours gained per person per day; total population benefit in a year in a population of 10,000 (METs) | Total estimated intervention cost (\$2006); total cost / year in 10,000 population (\$) | Cost-effective-ness ratio (estimated \$/MET hour gained) | Study quality rating total score <sup>a</sup> |
|-----------------------------------------------------|---------------------------------------------------------|-----------------------------------------------------------------------------------------------------------------------------|-----------------------------------------|-----------------------------|--------------------------------------------------------------------------------------------|----------------------------------------------------------------------------------------------------------|-----------------------------------------------------------------------------------------|----------------------------------------------------------|-----------------------------------------------|
| Prochaska (2008), <sup>40</sup><br>RCT/CT, U.S.     | 433 worksite employees; 21.0                            | Three motivational interviewing in-person or telephone sessions                                                             | 6 months; 6 months                      | % people meeting guidelines | SUI: Godin Leisure Time Exercise Questionnaire (adapted to reflect guideline requirements) | 0.18; 673,425                                                                                            | 27,063; 1,250,000                                                                       | 1.86                                                     | 6                                             |
|                                                     | 503 worksite employees; 19.0                            | Recommended three online sessions                                                                                           | 6 months; 6 months                      | % people meeting guidelines | SUI: Godin Leisure Time Exercise Questionnaire (adapted to reflect guideline requirements) | 0.15; 558,450                                                                                            | 125; 4970                                                                               | 0.01                                                     | 6                                             |
| Proper (2003), <sup>41</sup><br>RCT/CT, Netherlands | 131 worksite workers; 74.4                              | Written information about lifestyle, seven 20-minute individual counseling sessions on physical activity fitness and health | 9 months; 9 months                      | kcal/day on all activities  | SUI: 7-day PDPAR                                                                           | 2.76; 10,084,429                                                                                         | 49,522; 5,040,356                                                                       | 0.95                                                     | 4                                             |
| Purath (2004), <sup>42</sup><br>pre-post, U.S.      | 134 sedentary employees; 0                              | 3–5 minutes brief, tailored counseling on physical activity plus a booster phone call by nurse                              | 2 weeks; 6 weeks                        | Minutes/week of walking     | SUI: PACE walking questionnaire                                                            | 0.74; 2,687,964                                                                                          | 811; 1,452,090                                                                          | 0.20                                                     | 3                                             |
|                                                     | 153 sedentary employees; 0                              | 3–5 minute brief counseling on physical activity                                                                            | One time; 6 weeks                       | Minutes/week of walking     | SUI: PACE walking questionnaire                                                            | 0.54; 1,986,643                                                                                          | 259; 202,941                                                                            | 0.07                                                     | 3                                             |
| Rhudy (2007), <sup>43</sup><br>RCT/CT, U.S.         | 70 older veteran primary care patients                  | 20 personal phone calls from a nurse                                                                                        | 12 months; 6 and 12 months              | Minutes/week of walking     | SUI: Last 7-day recall on walking                                                          | 0.21; 762,068                                                                                            | 5,336; 762,286                                                                          | 1.17                                                     | 7                                             |
|                                                     | 70 older veteran primary care patients                  | 10 randomly interspersed personal and 10 automated telephone calls                                                          | 12 months; 6 and 12 months              | Minutes/week of walking     | SUI: Last 7-day recall on walking                                                          | 0.21; 758,418                                                                                            | 3,818; 545,429                                                                          | 0.84                                                     | 7                                             |

| Study, design, country                                  | Number and type of population reached /observed; % male | Intervention description                                                                                                                                                                                       | Intervention duration; follow-up length | Reported measure                            | Measurement instrument                                                               | MET hours gained per person per day; total population benefit in a year in a population of 10,000 (METs) | Total estimated intervention cost (\$2006); total cost / year in 10,000 population (\$) | Cost-effective-ness ratio (estimated \$/MET hour gained) | Study quality rating total score <sup>a</sup> |
|---------------------------------------------------------|---------------------------------------------------------|----------------------------------------------------------------------------------------------------------------------------------------------------------------------------------------------------------------|-----------------------------------------|---------------------------------------------|--------------------------------------------------------------------------------------|----------------------------------------------------------------------------------------------------------|-----------------------------------------------------------------------------------------|----------------------------------------------------------|-----------------------------------------------|
| Shirazi (2007), <sup>44</sup><br>RCT/CT,<br>Iran        | 61 Iranian adults;<br>0                                 | Home-based exercise prescription consisting of strength and balance training that was progressive, individually tailored, and included a walking program                                                       | 3 months;<br>3 months                   | Minutes/<br>week of<br>physical<br>activity | SUI : Self-report<br>IPAQ<br>questionnaire                                           | 0.95;<br>3,449,250                                                                                       | 4,962;<br>3,253,934                                                                     | 0.94                                                     | 7                                             |
| Spittaels (2007), <sup>45</sup><br>pre-post,<br>Belgium | 174 worksite<br>workers;<br>67.2                        | Online tailored physical activity advice plus stage-based reinforcement e-mails                                                                                                                                | 2 months;<br>6 months                   | Minutes/<br>week of<br>MVPA                 | SUI and OBI:<br>IPAQ<br>Questionnaire<br>and<br>accelerometer.                       | 0.39;<br>1,425,238                                                                                       | 210;<br>72,414                                                                          | 0.03                                                     | 4                                             |
|                                                         | 175 worksite<br>workers;<br>68.0                        | Online tailored physical activity advice only                                                                                                                                                                  | One time;<br>6 months                   | Minutes/<br>week of<br>MVPA                 | SUI and OBI:<br>IPAQ<br>Questionnaire<br>and<br>accelerometer.                       | 0.33;<br>1,216,667                                                                                       | 105;<br>72,000                                                                          | 0.01                                                     | 4                                             |
|                                                         | 177 worksite<br>workers;<br>73.0                        | Online nontailored standard physical activity advice                                                                                                                                                           | One time;<br>6 months                   | Minutes/<br>week of<br>MVPA                 | SUI and OBI:<br>IPAQ<br>Questionnaire<br>and<br>accelerometer.                       | 0.50;<br>1,807,619                                                                                       | 105;<br>71,186                                                                          | 0.01                                                     | 4                                             |
| Stewart (2001), <sup>46</sup><br>RCT/CT,<br>U.S.        | 85 sedentary<br>seniors;<br>30.9                        | Inclusive, choice-based, individually tailored physical promotion program, including staff assistance in developing a physical activity regimen, encouraging exercise participation, and informational support | 12<br>months;<br>12 months              | kcal/week<br>of MVPA                        | SUI: Self-report<br>CHAMPS Physical<br>Activity<br>Questionnaire for<br>Older Adults | 0.98;<br>3,590,408                                                                                       | 30,969;<br>3,643,382                                                                    | 1.07                                                     | 6                                             |
| Wilcox (2006), <sup>47</sup><br>pre-post,<br>U.S.       | 384 community<br>older residents;<br>21.7               | 6-month telephone-based individually tailored program delivered through one face-to-face meeting followed by one-on-one telephone counseling (up to eight calls)                                               | 6 months;<br>6 months                   | Hours/<br>week of<br>MVPA                   | SUI: Self-report<br>CHAMPS Physical<br>Activity<br>Questionnaire for<br>Older Adults | 1.57;<br>5,725,286                                                                                       | 22,400;<br>1,166,667                                                                    | 0.30                                                     | 2                                             |
|                                                         | 454 community<br>older residents;<br>17.4               | 20-week group-based program                                                                                                                                                                                    | 5 months;<br>5 months                   | Hours/<br>week of<br>MVPA                   | SUI: Self-report<br>CHAMPS Physical<br>Activity<br>Questionnaire for<br>Older Adults | 1.70;<br>6,218,036                                                                                       | 15,000;<br>792,952                                                                      | 0.18                                                     | 2                                             |

| Study, design, country                                  | Number and type of population reached /observed; % male | Intervention description                                                                                                                                                           | Intervention duration; follow-up length | Reported measure                                       | Measurement instrument                                                                                                    | MET hours gained per person per day; total population benefit in a year in a population of 10,000 (METs) | Total estimated intervention cost (\$2006); total cost / year in 10,000 population (\$) | Cost-effective-ness ratio (estimated \$/MET hour gained) | Study quality rating total score <sup>a</sup> |
|---------------------------------------------------------|---------------------------------------------------------|------------------------------------------------------------------------------------------------------------------------------------------------------------------------------------|-----------------------------------------|--------------------------------------------------------|---------------------------------------------------------------------------------------------------------------------------|----------------------------------------------------------------------------------------------------------|-----------------------------------------------------------------------------------------|----------------------------------------------------------|-----------------------------------------------|
| <b>School-based physical activity intervention</b>      |                                                         |                                                                                                                                                                                    |                                         |                                                        |                                                                                                                           |                                                                                                          |                                                                                         |                                                          |                                               |
| van Beurden, (2003), <sup>48</sup><br>RCT/CT, Australia | 523 children; 53.0                                      | School project teams, project website, funding for purchase of equipment                                                                                                           | 1 school year; 1 year                   | % physical education class time spent on VPA           | OBI: Direct observation on four selected students (SOFIT)                                                                 | 0.06; 126,000                                                                                            | 41,009; 1,045,475                                                                       | 6.91                                                     | 6                                             |
| Haerens (2006), <sup>49</sup><br>RCT/CT, Belgium        | 2232 children; 100                                      | Intervention combining environmental changes with computer-tailored feedback (plus parental involvement)                                                                           | 2 school years; 2 school years          | Minutes/day in school physical activity                | 0 and SUI: Self-report FPAQ and accelerometer. Here we use self-report measure because small sample in accelerometer data | 0.29; 570,000                                                                                            | 11,006; 32,872                                                                          | 0.11                                                     | 7                                             |
| Haerens (2007), <sup>50</sup><br>RCT/CT, Belgium        | 139 adolescents; 46.8                                   | Computer-tailored intervention to increase physical activity provided by CDs                                                                                                       | One time; 3 months                      | Minutes/day on school-related physical activity        | SUI: Self-report FPAQ                                                                                                     | 0.23; 465,000                                                                                            | 525; 453,237                                                                            | 0.27                                                     | 7                                             |
| Harrison (2006), <sup>51</sup><br>RCT/CT, Ireland       | 182 children; 56.0                                      | Teacher-led physical activity education                                                                                                                                            | 4 months; 4 months                      | 30-minute blocks of MVPA per day                       | SUI: 1-day PDPAR                                                                                                          | 0.47; 1,724,625                                                                                          | 10,097; 1,664,341                                                                       | 1.06                                                     | 6                                             |
| Hill (2007), <sup>52</sup><br>RCT/CT, UK                | 157 younger adults; 49.0                                | Leaflet only: leaflet was designed to target intentions, behavioral control, attitudes, and normative beliefs in relation to physical activity outside of physical education class | One time; 3 weeks                       | Frequency of exercise for at least 30 minutes per week | SUI: Self-report past 3-week recall: number of times exercised at least 30 minutes per week                               | 0.12; 434,089                                                                                            | 165; 126,000 METS                                                                       | 0.48                                                     | 6                                             |

| Study, design, country                                        | Number and type of population reached /observed; % male | Intervention description                                                                                                                                                                             | Intervention duration; follow-up length | Reported measure                                       | Measurement instrument                                                                              | MET hours gained per person per day; total population benefit in a year in a population of 10,000 (METs) | Total estimated intervention cost (\$2006); total cost / year in 10,000 population (\$) | Cost-effective-ness ratio (estimated \$/MET hour gained) | Study quality rating total score <sup>a</sup> |
|---------------------------------------------------------------|---------------------------------------------------------|------------------------------------------------------------------------------------------------------------------------------------------------------------------------------------------------------|-----------------------------------------|--------------------------------------------------------|-----------------------------------------------------------------------------------------------------|----------------------------------------------------------------------------------------------------------|-----------------------------------------------------------------------------------------|----------------------------------------------------------|-----------------------------------------------|
|                                                               | 162 younger adults; 49.0                                | Leaflet plus motivational quiz                                                                                                                                                                       | One time; 3 weeks                       | Frequency of exercise for at least 30 minutes per week | SUI: Self-report last 3-week recall: number of times exercised at least 30 minutes per week         | 0.27; 973,768                                                                                            | 259; 192,111                                                                            | 0.33                                                     | 6                                             |
|                                                               | 144 younger adults; 49.0                                | Leaflet plus implementation-intention prompt                                                                                                                                                         | One time; 3 weeks                       | Frequency of exercise for at least 30 minutes per week | SUI: Self-report last 3-week recall: number of times exercised at least 30 minutes per week         | 0.22; 797,786                                                                                            | 151; 126,000                                                                            | 0.26                                                     | 6                                             |
| Luepker (1996), <sup>53</sup> RCT/CT, UK                      | 3651 children; 51.4                                     | School-based program consisting of school food-service modifications, physical education interventions, and classroom health curricula plus family-based program (home curricula, family fun nights) | 3 school years; 2 and 3 school years    | Minutes/day of VPA                                     | SUI and OBI: Self-report physical activity checklist (SAPAC) 1-day recall, SOFIT. We use SAPAC here | 1.21; 2,420,000                                                                                          | 74,510; 90,703                                                                          | 0.03                                                     | 6                                             |
| Manios (1999, 2005 and 2006), <sup>54-56</sup> RCT/CT, Greece | 4171 children; 52.9                                     | Health education, parental involvement                                                                                                                                                               | 6 school years; 3, 6, and 10 years      | Minutes/week of leisure-time MVPA                      | SUI: Parental or students' reporting                                                                | 1.25; 4,559,893                                                                                          | 534,300; 284,664                                                                        | 0.05                                                     | 6, 7, 7                                       |
| Mahar (2006), <sup>57</sup> post-measure comparison, U.S.     | 135 children                                            | Classroom-based physical activity led by teachers                                                                                                                                                    | 1 month; 1 month                        | Pedometer counts/day in school                         | OBI: Pedometer counts                                                                               | 0.33; 664,700                                                                                            | 522; 464,089                                                                            | 0.58                                                     | 5                                             |

| Study, design, country                                                                               | Number and type of population reached /observed; % male | Intervention description                                                                                                                                                                                                   | Intervention duration; follow-up length           | Reported measure                         | Measurement instrument                                                   | MET hours gained per person per day; total population benefit in a year in a population of 10,000 (METs) | Total estimated intervention cost (\$2006); total cost / year in 10,000 population (\$) | Cost-effective-ness ratio (estimated \$/MET hour gained) | Study quality rating total score <sup>a</sup> |
|------------------------------------------------------------------------------------------------------|---------------------------------------------------------|----------------------------------------------------------------------------------------------------------------------------------------------------------------------------------------------------------------------------|---------------------------------------------------|------------------------------------------|--------------------------------------------------------------------------|----------------------------------------------------------------------------------------------------------|-----------------------------------------------------------------------------------------|----------------------------------------------------------|-----------------------------------------------|
| McKenzie (1996), <sup>58</sup> RCT/CT, and Nader (1999), <sup>59</sup> post-measure comparison, U.S. | 5352 children; 50                                       | The total CATCH intervention included a food-service intervention, a physical education program, classroom curriculum promoting cardiovascular health, a tobacco curriculum and school policy, and a home/family component | 22.5 school months; 30, 36, 48, 60, and 72 months | Minutes/day of VPA                       | SUI: 1-day recall, self-administered physical activity checklist (SAPAC) | 1.37; 2,740,000                                                                                          | 400,113; 398,717                                                                        | 0.33                                                     | 7, 5                                          |
| McKenzie (2004), <sup>60</sup> RCT/CT, U.S.                                                          | 13,308 adolescents                                      | School-based physical education class                                                                                                                                                                                      | 2 school years; 2 years                           | Minutes/physical education class on MVPA | OBI: Direct observation of PE lessons using SOFIT system                 | 0.19; 375,000                                                                                            | 144,600; 72,438                                                                         | 0.17                                                     | 6                                             |
| Pate (2005), <sup>61</sup> RCT/CT, U.S.                                                              | 4557 adolescents; 0                                     | Physical education, health education, school environment, school health services, faculty/staff health promotion, family/community involvement                                                                             | 1 school year; 1 year                             | % ≥1 30-minute block of VPA/all day      | SUI: 3-day PDPAR (Tuesday, Monday, and Sunday)                           | 0.28; 1,018,350                                                                                          | 1,205,781; 3,527,996                                                                    | 7.78                                                     | 6                                             |
| Pangrazi (2003), <sup>62</sup> pre-post, U.S.                                                        | 185 children; 50.8                                      | PLAY + physical education: physical activity teaching at 15-minute activity break during school day plus physical education on physical activity lifestyle habits                                                          | 3 months; 3 months                                | Pedometer counts/day                     | OBI: Pedometer counts                                                    | 0.67; 1,345,550                                                                                          | 874; 188,973                                                                            | 0.12                                                     | 4                                             |
|                                                                                                      | 178 children; 47.7                                      | Physical education only: physical education on physical activity lifestyle habits                                                                                                                                          | 3 months; 3 months                                | Pedometer counts/day                     | OBI: Pedometer counts                                                    | 0.52; 1,037,850                                                                                          | 0; 0                                                                                    | 0                                                        | 4                                             |
|                                                                                                      | 150 children; 50.0                                      | PLAY only: physical activity teaching at 15-minute activity break during school day                                                                                                                                        | 3 months; 3 months                                | Pedometer counts/day                     | OBI: Pedometer counts                                                    | 0.60; 1,205,300                                                                                          | 759; 202,400                                                                            | 0.14                                                     | 4                                             |
| Sallis (2003), <sup>63</sup> RCT/CT, U.S.                                                            | 13,308 adolescents; 100                                 | School-based physical education intervention, nutrition intervention (provide low-fat foods) and environmental, policy, and social marketing interventions                                                                 | 2 school years; 2 years                           | kcal/school day on MVPA                  | OBI: Direct observation (SOFIT)                                          | 0.42; 840,857                                                                                            | 508,913; 254,941                                                                        | 0.50                                                     | 7                                             |

| Study, design, country                           | Number and type of population reached /observed; % male | Intervention description                                                                                                                                                                                                                                                                                          | Intervention duration; follow-up length | Reported measure           | Measurement instrument                                                                                              | MET hours gained per person per day; total population benefit in a year in a population of 10,000 (METs) | Total estimated intervention cost (\$2006); total cost / year in 10,000 population (\$) | Cost-effective-ness ratio (estimated \$/MET hour gained) | Study quality rating total score <sup>a</sup> |
|--------------------------------------------------|---------------------------------------------------------|-------------------------------------------------------------------------------------------------------------------------------------------------------------------------------------------------------------------------------------------------------------------------------------------------------------------|-----------------------------------------|----------------------------|---------------------------------------------------------------------------------------------------------------------|----------------------------------------------------------------------------------------------------------|-----------------------------------------------------------------------------------------|----------------------------------------------------------|-----------------------------------------------|
| Salmon (2008), <sup>64</sup> RCT/CT, Australia   | 66 children; 49.3                                       | Behavioral modification group: consists of 19 lessons (40–50 minutes each) delivered by qualified physical education teacher in addition to regular physical education and sports classes. The behavioral modification classes were delivered in classroom.                                                       | 1 school year; 9 and 12 months          | MET minutes/day of MVPA    | OBI: Accelerometer                                                                                                  | 0.50; 990,000                                                                                            | 62,500; 12,626,263                                                                      | 8.77                                                     | 6                                             |
|                                                  | 74 children; 47.4                                       | Fundamental movement skills group: consists of 19 lessons (40–50 minutes each) delivered by qualified physical education teacher in addition to regular physical education and sports classes. The fundamental movement skills classes were delivered at indoor or outdoor physical activity facilities at school | 1 school year; 9 and 12 months          | MET minutes/day of MVPA    | OBI: Accelerometer                                                                                                  | 1.25; 2,490,000                                                                                          | 625,000; 11,261,261                                                                     | 3.03                                                     | 6                                             |
| Simons-Morton (1991), <sup>65</sup> RCT/CT, U.S. | 171 children                                            | Three components: go for health curriculum (training, consultation, technical support); children's active physical education (teach knowledge and skills of diet and physical activity, encourage physical activity); and new school lunch (provide low-fat and low-sodium lunch)                                 | 18 school months; 18 and 36 months      | Minutes/session of MVPA    | OBI: Observers reported minute-by-minute basis activity using CPAOF (Children's Physical Activity Observation Form) | 0.73; 1,452,000                                                                                          | 92,000; 3,586,745                                                                       | 4.23                                                     | 6                                             |
| Verstraete (2007), <sup>66</sup> RCT/CT, Belgium | 405 children; 49.2                                      | A health-related physical education program, classroom-based health education lessons, and an extracurricular physical activity–promotion program                                                                                                                                                                 | 2 school years; 2 years                 | Minutes/school day of MVPA | OBI and SUI: Accelerometer and leisure time self-report physical activity. Accelerometer data are used here.        | 1.41; 2,815,167                                                                                          | 192,500; 3,168,724                                                                      | 0.94                                                     | 6                                             |

| Study, design, country                                 | Number and type of population reached /observed; % male | Intervention description                                                                                                                                                                      | Intervention duration; follow-up length | Reported measure               | Measurement instrument    | MET hours gained per person per day; total population benefit in a year in a population of 10,000 (METs) | Total estimated intervention cost (\$2006); total cost / year in 10,000 population (\$) | Cost-effective-ness ratio (estimated \$/MET hour gained) | Study quality rating total score <sup>a</sup> |
|--------------------------------------------------------|---------------------------------------------------------|-----------------------------------------------------------------------------------------------------------------------------------------------------------------------------------------------|-----------------------------------------|--------------------------------|---------------------------|----------------------------------------------------------------------------------------------------------|-----------------------------------------------------------------------------------------|----------------------------------------------------------|-----------------------------------------------|
| <b>Social support in community context</b>             |                                                         |                                                                                                                                                                                               |                                         |                                |                           |                                                                                                          |                                                                                         |                                                          |                                               |
| Aldana (2005, 2006), <sup>67, 68</sup><br>RCT/CT, U.S. | 174 adults; 27                                          | 40-hour educational course                                                                                                                                                                    | 1 month; 1.5 and 6 months               | Steps/ week of walking         | OBI: Pedometer count      | 0.41; 1,487,206                                                                                          | 13,179; 9,088,966                                                                       | 1.16                                                     | 6                                             |
| Dunn (1999), <sup>69</sup><br>pre-post, U.S.           | 121 sedentary adults; 50                                | Lifestyle physical activity group: meetings on cognitive and behavioral skills in the format of small groups that met for 1 hour per week for the first 16 weeks, then biweekly until Week 24 | 24 months; 24 months                    | kcal/kg/ day                   | SUI: 7-day PDPAR          | 0.06; 206,174                                                                                            | 60,317; 2,492,437                                                                       | 14.64                                                    | 3                                             |
|                                                        | 114 sedentary adults; 49.1                              | Traditional structured exercise group: supervised group exercise 5 days per week for 6 months                                                                                                 | 24 months; 24 months                    | kcal/kg/ day                   | SUI: 7-day PDPAR          | 0.05; 169,357                                                                                            | 183,479; 8,047,303                                                                      | 60.22                                                    | 3                                             |
| Clarke (2007), <sup>70</sup><br>pre-post, U.S.         | 124 low-income mothers; 0                               | Eight weekly class physical activity discussions plus pedometer use                                                                                                                           | 2 months; 2 months                      | Pedometer counts/ day          | OBI: Pedometer counts/day | 1.61; 3,219,800                                                                                          | 10,626; 5,141,613                                                                       | 1.17                                                     | 3                                             |
| Issacs (2007), <sup>71</sup><br>pre-post, UK           | 315 sedentary older adults; 31.7                        | Advice-only group who received tailored advice and information on physical activity including information on local exercise facilities                                                        | One time; 2.5 and 6 months              | Minutes/ week of MVPA          | SUI: 7-day PDPAR          | 0.33; 1,203,718                                                                                          | 1654; 630,000                                                                           | 0.21                                                     | 4                                             |
|                                                        | 317 sedentary older adults; 35.0                        | 10-week program of supervised exercise classes, two to three times per week in a local leisure center                                                                                         | 2.5 months; 2.5, 6, and 12 months       | Minutes/ week of MVPA          | SUI: 7-day PDPAR          | 0.20; 718,529                                                                                            | 111,823; 16,932,192                                                                     | 9.32                                                     | 4                                             |
|                                                        | 311 sedentary older adults; 31.2                        | 10-week instructor-led walking program, two to three times per week                                                                                                                           | 2.5 months; 2.5, 6, and 12 months       | Minutes/ week of MVPA          | SUI: 7-day PDPAR          | 0.52; 1,884,182                                                                                          | 95,767; 14,780,784                                                                      | 3.32                                                     | 4                                             |
| Jancey (2008), <sup>72</sup><br>RCT/CT, Australia      | 260 seniors; 35.1                                       | Supervised walking program meeting twice per week for 6 months                                                                                                                                | 6 months; 6 months                      | Hours/ week of walking and MPA | SUI: Self-report IPAQ     | 0.96; 3,504,000                                                                                          | 28,497; 2,192,077                                                                       | 0.92                                                     | 5                                             |



| Study, design, country                          | Number and type of population reached /observed; % male | Intervention description                                                                                                                                                                                                                                                               | Intervention duration; follow-up length | Reported measure        | Measurement instrument                                                         | MET hours gained per person per day; total population benefit in a year in a population of 10,000 (METs) | Total estimated intervention cost (\$2006); total cost / year in 10,000 population (\$) | Cost-effective-ness ratio (estimated \$/MET hour gained) | Study quality rating total score <sup>a</sup> |
|-------------------------------------------------|---------------------------------------------------------|----------------------------------------------------------------------------------------------------------------------------------------------------------------------------------------------------------------------------------------------------------------------------------------|-----------------------------------------|-------------------------|--------------------------------------------------------------------------------|----------------------------------------------------------------------------------------------------------|-----------------------------------------------------------------------------------------|----------------------------------------------------------|-----------------------------------------------|
| Jancy (2008), <sup>73</sup> pre-post, Australia | 260 seniors; 33.0                                       | Neighborhood-based walking program meeting twice per week for 26 weeks led by volunteer leaders                                                                                                                                                                                        | 6 months; 6 and 12 months               | Hours/week of walking   | SUI: Self-report IPAQ                                                          | 0.65; 2,362,071                                                                                          | 123,550; 9,503,846                                                                      | 4.63                                                     | 5                                             |
| Jeffery (2003), <sup>74</sup> pre-post, U.S.    | 93 obese adults; 42.0                                   | Standard behavior therapy (group instructions) for obesity with an energy expenditure goal of 1000 kcal/week                                                                                                                                                                           | 18 months; 6, 12, and 18 months         | kcal/week of MVPA       | SUI: Self-report last week recall Paffenbarger Physical Activity Questionnaire | 0.70; 2,555,000                                                                                          | 9738; 698,029                                                                           | 0.32                                                     | 3                                             |
|                                                 |                                                         | Standard behavior therapy plus high physical activity treatment with an energy expenditure goal of 2500 kcal/week, including group instructions, exercise partners recruitment, personal counseling, and small monetary incentives                                                     | 18 months; 6, 12, and 18 months         | kcal/week of MVPA       | SUI: Self-report last week recall Paffenbarger Physical Activity Questionnaire | 2.12; 7,739,490                                                                                          | 67,738; 4,142,966                                                                       | 0.69                                                     | 3                                             |
| Kanders (1994), <sup>75</sup> pre-post, U.S.    | 61 obese African-American women; 0                      | Weight-loss program: women were placed on a culturally appropriate, low-fat, nutrient-balanced, 1200-kcal diet, in which two meals were consumed as meal-replacement shakes or Lactaid capsules. They also participated in group educational sessions and received monetary incentives | 2.5 months; 2.5 months                  | Minutes/week of walking | SUI: Self-reported                                                             | 0.49; 1,772,857                                                                                          | 14,847; 11,682,492                                                                      | 6.59                                                     | 2                                             |
| Latimer (2007), <sup>76</sup> pre-post, U.S.    | 101 sedentary adults; 10.9                              | Pedometer plus gain-framed information printouts                                                                                                                                                                                                                                       | 1 month; 2 and 10 weeks                 | MET minutes/week        | SUI: Self-report IPAQ                                                          | 2.39; 8,714,810                                                                                          | 2121; 2,520,000                                                                         | 0.23                                                     | 3                                             |
|                                                 | 106 sedentary adults; 11.3                              | Pedometer plus loss-framed information printouts                                                                                                                                                                                                                                       | 1 month; 2 and 10 weeks                 | MET minutes/week        | SUI: Self-report IPAQ                                                          | 1.47; 5,372,018                                                                                          | 2226; 2,520,000                                                                         | 0.39                                                     | 3                                             |
|                                                 | 115 sedentary adults; 16.5                              | Pedometer plus mixed-framed information printouts                                                                                                                                                                                                                                      | 1 month; 2 and 10 weeks                 | MET minutes/week        | SUI: Self-report IPAQ                                                          | 1.16; 4,243,212                                                                                          | 2,415; 2,520,000                                                                        | 0.54                                                     | 3                                             |
| Martinson (2007), <sup>77</sup> RCT/CT, U.S.    | 523 older adults; 27.1                                  | Interactive telephone- and mail-based physical activity support program with main component a 7-session course delivered by activity coaches                                                                                                                                           | 6 months; 6 months                      | kcal/week on MVPA       | SUI: Self-report CHAMPS questionnaire                                          | 1.14; 4,178,878                                                                                          | 84,036; 3,213,623                                                                       | 0.81                                                     | 6                                             |

| Study, design, country                               | Number and type of population reached /observed; % male | Intervention description                                                                                                                                                          | Intervention duration; follow-up length | Reported measure                                           | Measurement instrument                                                                                                                            | MET hours gained per person per day; total population benefit in a year in a population of 10,000 (METs) | Total estimated intervention cost (\$2006); total cost / year in 10,000 population (\$) | Cost-effective-ness ratio (estimated \$/MET hour gained) | Study quality rating total score <sup>a</sup> |
|------------------------------------------------------|---------------------------------------------------------|-----------------------------------------------------------------------------------------------------------------------------------------------------------------------------------|-----------------------------------------|------------------------------------------------------------|---------------------------------------------------------------------------------------------------------------------------------------------------|----------------------------------------------------------------------------------------------------------|-----------------------------------------------------------------------------------------|----------------------------------------------------------|-----------------------------------------------|
| Miller (2002), <sup>78</sup> RCT/CT, Australia       | 199 mothers of preschool children; 0                    | Providing print information about overcoming physical activity barriers, and inviting participants to discuss the development of local strategies for physical activity promotion | 2 months; 2 months                      | % people meeting guidelines for adequate physical activity | SUI: Last 7-day recall questionnaire modified from the Active Australia evaluation                                                                | 0.12; 443,475                                                                                            | 45,822; 13,815,603                                                                      | 40.81                                                    | 7                                             |
| Mutrie (2002), <sup>79</sup> RCT/CT, UK              | 145 community residents; 36.0                           | Written interactive materials based on the transtheoretical model of behavior change, local information about distances and routes, and safety information                        | One time; 6 months                      | Minutes/week of walking                                    | SUI: 7-day PDPAR                                                                                                                                  | 0.11; 393,621                                                                                            | 6,825; 5,648,276                                                                        | 3.40                                                     | 6                                             |
| Opdenacker (2008), <sup>80, 81</sup> RCT/CT, Belgium | 60 seniors; 50                                          | Structured exercise program: three weekly sessions of 60–90 minutes in a fitness center including endurance, strength, flexibility, and balance training                          | 11 months; 11 months                    | Steps/day of walking                                       | OBI and SUI: Self-report questionnaire (Flemish Physical Activity Computerized Questionnaire), pedometer and accelerometer. Step counts used here | 0.12; 452,965                                                                                            | 71,760; 13,047,273                                                                      | 29.81                                                    | 6                                             |
|                                                      | 60 seniors; 50                                          | Lifestyle program: individualized home-based program (information brochure, pedometer use, training) supported by phone calls                                                     | 11 months; 11 and 23 months             | Steps/day of walking                                       | OBI and SUI: Self-report questionnaire (Flemish Physical Activity Computerized Questionnaire), pedometer and accelerometer. Step counts used here | 0.91; 3,321,226                                                                                          | 8,777; 1,595,886                                                                        | 0.52                                                     | 6                                             |

| Study, design, country                              | Number and type of population reached /observed; % male | Intervention description                                                                                                                                                                                                                                                                                   | Intervention duration; follow-up length | Reported measure                  | Measurement instrument                   | MET hours gained per person per day; total population benefit in a year in a population of 10,000 (METs) | Total estimated intervention cost (\$2006); total cost / year in 10,000 population (\$) | Cost-effective-ness ratio (estimated \$/MET hour gained) | Study quality rating total score <sup>a</sup> |
|-----------------------------------------------------|---------------------------------------------------------|------------------------------------------------------------------------------------------------------------------------------------------------------------------------------------------------------------------------------------------------------------------------------------------------------------|-----------------------------------------|-----------------------------------|------------------------------------------|----------------------------------------------------------------------------------------------------------|-----------------------------------------------------------------------------------------|----------------------------------------------------------|-----------------------------------------------|
| Pazoki (2007), <sup>82</sup> RCT/CT, Iran           | 179 adults; 0                                           | Community-based lifestyle modification: audio-taped activity instructions with music and practical usage of the educational package were given in weekly home-visits                                                                                                                                       | 2 months; 2 months                      | Minutes/week of MVPA (mostly MPA) | SUI: 7-day PDPAR                         | 0.76; 2,768,525                                                                                          | 1,919; 643,156                                                                          | 0.24                                                     | 7                                             |
| Renaud (2008), <sup>83</sup> pre-post, Canada       | 656 worksite workers                                    | Six educational modules delivered over 3 years plus telephone follow-up                                                                                                                                                                                                                                    | 36 months; 36 months                    | % of people meeting guidelines    | SUI: Self-report                         | 0.17; 629,625                                                                                            | 625,000; 317,581                                                                        | 1.96                                                     | 2                                             |
| Sherman (2007), <sup>84</sup> pre-post, U.S.        | 75 adults; 0                                            | Pedometer, exercise videotape, and exercise counseling                                                                                                                                                                                                                                                     | 6 months; 6 months                      | Pedometer counts/day              | OBI: Pedometer counts/day                | 1.09; 3,991,366                                                                                          | 4,060; 1,082,533                                                                        | 0.33                                                     | 3                                             |
| Simkin-Silverman (2003), <sup>85</sup> RCT/CT, U.S. | 260 adults; 0                                           | Lifestyle intervention: including 15 group meetings (20 women per group) on behavioral, dietary, or physical activity topic; additional behavioral skills, support, and motivation support were provided after group meeting. Mail, telephone follow-up, and incentives/ group competitions were provided. | 54 months; 30, 42, and 54 months        | kcal/week on physical activity    | SUI: Paffenbarger Activity Questionnaire | 0.79; 2,891,694                                                                                          | 48,438; 414,000                                                                         | 0.15                                                     | 5                                             |
| Steele (2007), <sup>86</sup> pre-post, Australia    | 65 adults; 10.8                                         | 1-hour weekly group-based sessions                                                                                                                                                                                                                                                                         | 3 months; 3, 5, and 8 months            | Minutes/week of MVPA              | SUI: Active Australia Questionnaire      | 2.89; 10,562,839                                                                                         | 8746; 5,382,000                                                                         | 0.25                                                     | 4                                             |
|                                                     |                                                         | Weekly Internet module plus two additional 1-hour face-to-face sessions                                                                                                                                                                                                                                    | 3 months; 3, 5, and 8 months            | Minutes/week of MVPA              | SUI: Active Australia Questionnaire      | 1.90; 6,921,964                                                                                          | 2,806; 1,726,769                                                                        | 0.13                                                     | 4                                             |
|                                                     |                                                         | Weekly Internet module                                                                                                                                                                                                                                                                                     | 3 months; 3, 5, and 8 months            | Minutes/week of MVPA              | SUI: Active Australia Questionnaire      | 1.82; 6,659,946                                                                                          | 1,541; 994,194                                                                          | 0.07                                                     | 4                                             |
| Thomas (2006), <sup>87</sup> pre-post, Australia    | 1195 worksite workers; 24.5                             | Pedometer-based workplace promotion program                                                                                                                                                                                                                                                                | 1 month; 1 month                        | Pedometer counts/weekday          | OBI: Pedometer counts/day                | 0.37; 1,354,241                                                                                          | 16,618; 1,668,703                                                                       | 2.61                                                     | 3                                             |

| Study, design, country                                              | Number and type of population reached /observed; % male | Intervention description                                                                                                                                                                                                                                                                                                               | Intervention duration; follow-up length | Reported measure                                      | Measurement instrument                                                                                                     | MET hours gained per person per day; total population benefit in a year in a population of 10,000 (METs) | Total estimated intervention cost (\$2006); total cost / year in 10,000 population (\$) | Cost-effective-ness ratio (estimated \$/MET hour gained) | Study quality rating total score <sup>a</sup> |
|---------------------------------------------------------------------|---------------------------------------------------------|----------------------------------------------------------------------------------------------------------------------------------------------------------------------------------------------------------------------------------------------------------------------------------------------------------------------------------------|-----------------------------------------|-------------------------------------------------------|----------------------------------------------------------------------------------------------------------------------------|----------------------------------------------------------------------------------------------------------|-----------------------------------------------------------------------------------------|----------------------------------------------------------|-----------------------------------------------|
| Whitt-Glover (2008), <sup>88</sup> pre-post, U.S.                   | 87 sedentary blacks; 11.0                               | Eight group sessions that included discussion of physical activity-related topics, an instructor-led physical activity session, and weekly incentives to promote physical activity                                                                                                                                                     | 3 months; 1 and 3 months                | Pedometer counts/day                                  | OBI and SUI: Pedometer counts and self-report international physical activity questionnaire last 7-day recall supplemented | 0.58; 2,129,866                                                                                          | 4313; 1,982,759                                                                         | 1.14                                                     | 3                                             |
| Wilbur (2008), <sup>89</sup> pre-post, U.S.                         | 156 sedentary African Americans; 0                      | Individualized orientation including a tailored walking prescription, health information, and goal-setting; received heart rate monitor to wear during walking; four weekly targeted workshops lasting 60 minutes followed by tailored staff telephone calls; reported walking frequencies through automated telephone response system | 12 months; 4 and 12 months              | % of people meeting guidelines                        | SUI: Self-report                                                                                                           | 0.33; 1,209,975                                                                                          | 44,735; 2,867,628                                                                       | 3.66                                                     | 2                                             |
|                                                                     | 125 sedentary African Americans; 0                      | Individualized orientation including a tailored walking prescription, health information, and goal-setting; received heart rate monitor to wear during walking; reported walking frequencies through automated telephone response system or reminder calls                                                                             | 12 months; 4 and 12 months              | % of people meeting guidelines                        | SUI: Self-report                                                                                                           | 0.17; 635,100                                                                                            | 20,988; 1,679,000                                                                       | 5.17                                                     | 2                                             |
| <b>Creating or improving access to places for physical activity</b> |                                                         |                                                                                                                                                                                                                                                                                                                                        |                                         |                                                       |                                                                                                                            |                                                                                                          |                                                                                         |                                                          |                                               |
| Ridgers (2007), <sup>90</sup> RCT/CT, UK                            | 4271 children; 50.8                                     | Received funding to redesign the playground environment to make it multicolored, based on the sports playground zonal design                                                                                                                                                                                                           | One time; 1.5 and 6 months              | % time spent on MVPA during school recess             | OBI: heart rate telemetry and accelerometer                                                                                | 0.26; 513,000                                                                                            | 587,100; 458,207                                                                        | 4.47                                                     | 7                                             |
| Stratton (2005), <sup>91</sup> RCT/CT, UK                           | 1139 children; 50.0                                     | Paint playgrounds with multicolored markings                                                                                                                                                                                                                                                                                           | One time; 1 month                       | Minutes/school day spent on MVPA in school playground | OBI: Sportstester heart rate telemeters                                                                                    | 0.98; 3,558,750                                                                                          | 5,779; 16,914                                                                           | 0.17                                                     | 7                                             |

| Study, design, country                           | Number and type of population reached /observed; % male | Intervention description | Intervention duration; follow-up length | Reported measure                                        | Measurement instrument | MET hours gained per person per day; total population benefit in a year in a population of 10,000 (METs) | Total estimated intervention cost (\$2006); total cost / 10,000 population (\$) | Cost-effective-ness ratio (estimated \$/MET hour gained) | Study quality rating total score <sup>a</sup> |
|--------------------------------------------------|---------------------------------------------------------|--------------------------|-----------------------------------------|---------------------------------------------------------|------------------------|----------------------------------------------------------------------------------------------------------|---------------------------------------------------------------------------------|----------------------------------------------------------|-----------------------------------------------|
| Verstraete (2006), <sup>92</sup> RCT/CT, Belgium | 122 children; 61.5                                      | Provide game equipment   | 3 months; 3 months                      | % time spent on MVPA in morning recess and lunch recess | OBI: accelerometers    | 0.62; 1,246,050                                                                                          | 1840; 50,273                                                                    | 0.40                                                     | 7                                             |

CATCH, The Child and Adolescent Trial for Cardiovascular Health; CHAMPS, Community Healthy Activities Model Program for Seniors; CT, controlled trial; FPAQ, Flemish Physical Activity Questionnaire; IPAQ, International Physical Activity Questionnaire; MPA, moderate physical activity; MVPA, moderate-to-vigorous physical activity; OBI, objective instrument; PDPAR, past physical activity recall; SUI, subjective instrument; UK, United Kingdom; VPA, vigorous physical activity

<sup>a</sup>Study quality score:

Control group: Is there a control group?

Representativeness: Were study samples randomly recruited from study population with response rate of at least 60%?

Comparability: Were baseline characteristics of intervention and control groups, populations, or areas comparable, or if there were important differences in potential confounders at baseline, appropriate adjustments made in analysis?

Attrition rate: Were outcomes studied in cohort or panel of respondents with attrition rate of less than 30%?

Period of assessment: Was quantity of physical activity assessed capturing a period of >1 day? And was measurement capturing all kinds of physical activity?

Long-term follow-up: Did study do follow-up longer than 6 months after intervention ended?

Objective instrument: Were physical activity measurement instruments objective?

Instrument validity: Was instrument used to assess physical activity appropriate to research question(s) of the study—that is, capable of measuring outcome under consideration and either shown to be a valid and reliable measure in published research or in pilot study or recognized as acceptable measure?

Baseline validity: Was baseline measure already below physical activity national guidelines?

Total validity score: Sum of above criteria

## References for Appendix A

1. Bauman A, McLean G, Hurdle D, et al. Evaluation of the national ‘Push Play’ campaign in New Zealand—creating population awareness of physical activity. *N Z Med J* 2003;116(1179):U535.
2. DeCocker KA, De Bourdeaudhuij IM, Brown WJ, Cardon GM. Effects of “10,000 steps Ghent”: a whole-community intervention. *Am J Prev Med* 2007;33(6):455–63.

3. Reger B, Cooper L, Booth-Butterfield S, et al. Wheeling Walks: a community campaign using paid media to encourage walking among sedentary older adults. *Prev Med* 2002;35(3):285–92.
4. Wen LM, Thomas M, Jones H, et al. Promoting physical activity in women: evaluation of a 2-year community-based intervention in Sydney, Australia. *Health Promot Int* 2002;17(2):127–37.
5. Andersen RE, Franckowiak SC, Snyder J, Bartlett SJ, Fontaine KR. Can inexpensive signs encourage the use of stairs? Results from a community intervention. *Ann Intern Med* 1998;129(5):363–69.
6. Auweele YV. Promoting stair use among female employees: the effects of a health sign followed by an e-mail. *J Sport Exerc Psychol* 2005;27(2):188–96.
7. Blamey A, Mutrie N, Aitchison T. Health promotion by encouraged use of stairs. *BMJ* 1995;311(7000):289–90.
8. Boutelle KN, Jeffery RW, Murray DM. Using signs, artwork, and music to promote stair use in a public building. *Am J Public Health* 2004;91(12):2004–6.
9. Coleman KJ, Gonzalez EC. Promoting stair use in a U.S.–Mexico border community. *Am J Public Health* 2001;91(12):2007–9.
10. Kerr J, Eves FF, Carroll D. The influence of poster prompts on stair use: the effects of setting, poster size and content. *Br J Health Psychol* 2001;6(Pt 4):397–405.
11. Kerr L, Eves FF, Carroll D. Getting more people on the stairs: the impact of a new message format. *J Health Psychol* 2001;6(5):495–500.
12. Kerr NA, Yore MM, Ham SA, Dietz WH. Increasing stair use in a worksite through environmental changes. *Am J Health Promot* 2004;18(4):312–5.
13. Marshall AL, Bauman AE, Patch C, Wilson J, Chen J. Can motivational signs prompt increases in incidental physical activity in an Australian health-care facility? *Health Educ Res* 2002;17(6):743–9.
14. Russell WD, Dzewaltowski DA, Ryan GJ. The effectiveness of a point-of-decision prompt in deterring sedentary behavior. *Am J Health Promot* 1999;13(5):257–9, ii.
15. Russell WD, Hutchinson J. Comparison of health promotion and deterrent prompts in increasing use of stairs over escalators. *Percept Mot Skills* 2000;91(1):55–61.
16. Webb OJ, Eves FF. Promoting stair use: single versus multiple stair-riser messages. *Am J Public Health* 2005;95(9):1543–4.
17. Aittasalo M, Miilunpalo S, Kukkonen-Harjula K, Pasanen M. A randomized intervention of physical activity promotion and patient self-monitoring in primary health care. *Prev Med* 2006;42(1):40–6.
18. Arao T, Oida Y, Maruyama C, et al. Impact of lifestyle intervention on physical activity and diet of Japanese workers. *Prev Med* 2007;45(2–3):146–52.
19. Bock BC, Marcus BH, Pinto BM, Forsyth LH. Maintenance of physical activity following an individualized motivationally tailored intervention. *Ann Behav Med* 2001;23(2):79–87.
20. Chan CB, Ryan DA, Tudor-Locke C. Health benefits of a pedometer-based physical activity intervention in sedentary workers. *Prev Med* 2004;39(6):1215–22.
21. Chen AH, Sallis JF, Castro CM, et al. A home-based behavioral intervention to promote walking in sedentary ethnic minority women: project WALK. *Womens Health* 1998;4(1):19–39.
22. Croteau KA, Richeson NE, Farmer BC, Jones DB. Effect of a pedometer-based intervention on daily step counts of community-dwelling older adults. *Res Q Exerc Sport* 2007;78(5):401–6.
23. Elley CR, Kerse N, Arroll B, Robinson E. Effectiveness of counselling patients on physical activity in general practice: cluster randomised controlled trial. *BMJ* 2003;326(7393):793.

24. Green BB, Cheadle A, Pellegrini AS, Harris JR. Active for life: a work-based physical activity program. *Prev Chronic Dis* 2007;4(3):A63.
25. Halbert JA, Silagy CA, Finucane PM, Withers RT, Hamdorf PA. Physical activity and cardiovascular risk factors: effect of advice from an exercise specialist in Australian general practice. *Med J Aust* 2000;173(2):84–7.
26. Harrison RA, Roberts C, Elton PJ. Does primary care referral to an exercise programme increase physical activity one year later? A randomized controlled trial. *J Public Health (Oxf)* 2005;27(1):25–32.
27. Jimmy G, Martin BW. Implementation and effectiveness of a primary care based physical activity counselling scheme. *Patient Educ Couns* 2005;56(3):323–31.
28. King AC, Friedman R, Marcus B, et al. Ongoing physical activity advice by humans versus computers: the Community Health Advice by Telephone (CHAT) trial. *Health Psychol* 2007;26(6):718–27.
29. Kolt GS, Schofield GM, Kerse N, Garrett N, Oliver M. Effect of telephone counseling on physical activity for low-active older people in primary care: a randomized, controlled trial. *J Am Geriatr Soc* 2007;55(7):986–92.
30. Logue E, Sutton K, Jarjoura D, Smucker W, Baughman K, Capers C. Transtheoretical model—chronic disease care for obesity in primary care: a randomized trial. *Obes Res* 2005;13(5):917–27.
31. Marcus BH, Bock BC, Pinto BM, Forsyth LH, Roberts MB, Traficante RM. Efficacy of an individualized, motivationally-tailored physical activity intervention. *Ann Behav Med* 1998;20(3):174–80.
32. Marcus BH, Napolitano MA, King AC, et al. Telephone versus print delivery of an individualized motivationally tailored physical activity intervention: Project STRIDE. *Health Psychol* 2007;26(4):401–9.
33. Marshall AL, Bauman AE, Owen N, Booth ML, Crawford D, Marcus BH. Population-based randomized controlled trial of a stage-targeted physical activity intervention. *Ann Behav Med* 2003;25(3):194–202.
34. Mayer JA, Jermanovich A, Wright BL, Elder JP, Drew JA, Williams SJ. Changes in health behaviors of older adults: the San Diego Medicare Preventive Health Project. *Prev Med* 1994;23(2):127–33.
35. Napolitano MA, Whiteley JA, Papandonatos G, et al. Outcomes from the women’s wellness project: a community-focused physical activity trial for women. *Prev Med* 2006;43(6):447–53.
36. Nies MA, Chruscial HL, Hepworth JT. An intervention to promote walking in sedentary women in the community. *Am J Health Behav* 2003;27(5):524–35.
37. Nies MA, Partridge T. Comparison of 3 interventions to increase walking in sedentary women. *Am J Health Behav* 2006;30(4):339–52.
38. Ortega-Sanchez R, Jimenez-Mena C, Cordoba-Garcia R, Munoz-Lopez J, Garcia-Machado ML, Vilaseca-Canals J. The effect of office-based physician’s advice on adolescent exercise behavior. *Prev Med* 2004;38(2):219–26.
39. Patrick K, Calfas KJ, Norman GJ, et al. Randomized controlled trial of a primary care and home-based intervention for physical activity and nutrition behaviors: PACE+ for adolescents. *Arch Pediatr Adolesc Med* 2006;160(2):128–36.
40. Prochaska JO, Butterworth S, Redding CA, et al. Initial efficacy of MI, TTM tailoring and HRI’s with multiple behaviors for employee health promotion. *Prev Med* 2008;46(3):226–31.
41. Proper KI, Hildebrandt VH, Van der Beek AJ, Twisk JW, Van Mechelen W. Effect of individual counseling on physical activity fitness and health: a randomized controlled trial in a workplace setting. *Am J Prev Med* 2003;24(3):218–26.

42. Purath J, Miller AM, McCabe G, Wilbur J. A brief intervention to increase physical activity in sedentary working women. *Can J Nurs Res* 2004;36(1):76–91.
43. Rhudy JL, Dubbert PM, Kirchner KA, Williams AE. Efficacy of a program to encourage walking in VA elderly primary care patients: the role of pain. *Psychol Health Med* 2007;12(3):289–98.
44. Shirazi KK, Wallace LM, Niknami S, et al. A home-based, transtheoretical change model designed strength training intervention to increase exercise to prevent osteoporosis in Iranian women aged 40–65 years: a randomized controlled trial. *Health Educ Res* 2007;22(3):305–17.
45. Spittaels H, De Bourdeaudhuij I, Brug J, Vandelanotte C. Effectiveness of an online computer-tailored physical activity intervention in a real-life setting. *Health Educ Res* 2007;22(3):385–96.
46. Stewart AL, Verboncoeur CJ, McLellan BY, et al. Physical activity outcomes of CHAMPS II: a physical activity promotion program for older adults. *J Gerontol A Biol Sci Med Sci* 2001;56(8):M465–70.
47. Wilcox S, Dowda M, Griffin SF. Results of the first year of Active for Life: translation of 2 evidence-based physical activity programs for older adults into community settings. *Am J Public Health* 2006;96(7):1201–9.
48. van Beurden E, Barnett LM, Zask A, Dietrich UC, Brooks LO, Beard J. Can we skill and activate children through primary school physical education lessons? “Move it Groove it”—a collaborative health promotion intervention. *Prev Med* 2003;36(4):493–501.
49. Haerens L, Deforche B, Maes L, Cardon G, Stevens V, De Bourdeaudhuij I. Evaluation of a 2-year physical activity and healthy eating intervention in middle school children. *Health Educ Res* 2006;21(6):911–21.
50. Haerens L, Deforche B, Vandelanotte C, Maes L, De Bourdeaudhuij I. Acceptability, feasibility and effectiveness of a computer-tailored physical activity intervention in adolescents. *Patient Educ Couns* 2007;66(3):303–10.
51. Harrison M, Burns CF, McGuinness M, Heslin J, Murphy NM. Influence of a health education intervention on physical activity and screen time in primary school children: ‘Switch Off–Get Active’. *J Sci Med Sport* 2006;9(5):388–94.
52. Hill C, Abraham C, Wright DB. Can theory-based messages in combination with cognitive prompts promote exercise in classroom settings? *Soc Sci Med* 2007;65(5):1049–58.
53. Luepker RV, Perry CL, McKinlay SM, et al. Outcomes of a field trial to improve children’s dietary patterns and physical activity: The Child and Adolescent Trial for Cardiovascular Health (CATCH). *JAMA* 1996;275(10):768–76.
54. Manios Y, Kafatos I, Kafatos A. Ten-year follow-up of the Cretan Health and Nutrition Education Program on children’s physical activity levels. *Prev Med* 2006;43(6):442–46.
55. Manios Y, Moschandreas J, Hatzis C, Kafatos A. Evaluation of a health and nutrition education program in primary school children of Crete over a three-year period. *Prev Med* 1999;28(2):149–59.
56. Manios Y, Moschandreas J, Hatzis C, Kafatos A. Health and nutrition education in primary schools in Crete: 10 years’ follow-up of serum lipids, physical activity and macronutrient intake. *Br J Nutr* 2005;95(3):315–24.
57. Mahar MT, Murphy SK, Rowe DA, Golden J, Shields AT, Raedeke TD. Effects of a classroom-based program on physical activity and on-task behavior. *Med Sci Sports Exerc* 2006;38(12):2086–94.
58. McKenzie TL, Nader PR, Strikmiller PK, et al. School physical education: effect of the Child and Adolescent Trial for Cardiovascular Health. *Prev Med* 1996;25(4):423–31.



59. Nader PR, Stone EJ, Lytle LA, et al. Three-year maintenance of improved diet and physical activity: the CATCH cohort. *Child and Adolescent Trial for Cardiovascular Health. Arch Pediatr Adolesc Med* 1999;153(7):695–704.
60. McKenzie TL, Sallis JF, Prochaska JJ, Conway TL, Marshall SJ, Rosengard P. Evaluation of a two-year middle-school physical education intervention: M-SPAN. *Med Sci Sport Exerc* 2004;36(8):1382–8.
61. Pate RR, Dowda M, Ward DS, Saunders RP, Felton G, Dishman RK. Promotion of physical activity among high-school girls: A randomized controlled trial. *Am J Public Health* 2005;95(9):1582–7.
62. Pangrazi RP, Beighle A, Vehige T, Vack C. Impact of Promoting Lifestyle Activity for Youth (PLAY) on children’s physical activity. *J Sch Health* 2003;73(8):317–21.
63. Sallis JF, McKenzie TL, Conway TL, et al. Environmental interventions for eating and physical activity: a randomized controlled trial in middle schools. *Am J Prev Med* 2003;24(3):209–17.
64. Salmon J, Ball K, Hume C, Booth M, Crawford D. Outcomes of a group-randomized trial to prevent excess weight gain, reduce screen behaviors and promote physical activity in 10-year-old children: switch-play. *Int J Obes (Lond)* 2008;32(4):601–12.
65. Simons-Morton BG, Parcel GS, Baranowski T, Forthofer R, O’Hara NM. Promoting physical activity and a healthful diet among children: results of a school-based intervention study. *Am J Public Health* 1991;81(8):986–991.
66. Verstraete SJ, Cardon GM, De Clercq DL, De Bourdeaudhuij IM. A comprehensive physical activity promotion programme at elementary school: the effects on physical activity, physical fitness and psychosocial correlates of physical activity. *Public Health Nutr* 2007;10(5):477–84.
67. Aldana SG, Greenlaw RL, Diehl HA, et al. Effects of an intensive diet and physical activity modification program on the health risks of adults. *J Am Diet Assoc* 2005;105(3):371–81.
68. Aldana SG, Greenlaw RL, Diehl HA, et al. The behavioral and clinical effects of therapeutic lifestyle change on middle-aged adults. *Prev Chronic Dis* 2006;3(1):A05.
69. Dunn AL, Marcus BH, Kampert JB, Garcia ME, Kohl HW, 3rd, Blair SN. Comparison of lifestyle and structured interventions to increase physical activity and cardiorespiratory fitness: a randomized trial. *JAMA* 1999;281(4):327–34.
70. Clarke KK, Freeland-Graves J, Klohe-Lehman DM, Milani TJ, Nuss HJ, Laffrey S. Promotion of physical activity in low-income mothers using pedometers. *J Am Diet Assoc* 2007;107(6):962–7.
71. Isaacs AJ, Critchley JA, Tai SS, et al. Exercise Evaluation Randomised Trial (EXERT): a randomised trial comparing GP referral for leisure centre-based exercise, community-based walking and advice only. *Health Technol Assess* 2007;11(10):1–165, iii–iv.
72. Jancey JM, Lee AH, Howat PA, Clarke A, Wang K, Shilton T. The effectiveness of a physical activity intervention for seniors. *Am J Health Promot* 2008;22(5):318–21.
73. Jancey JM, Clarke A, Howat PA, Lee AH, Shilton T, Fisher J. A physical activity program to mobilize older people: a practical and sustainable approach. *Gerontologist* 2008;48(2):251–7.
74. Jeffery RW, Wing RR, Sherwood NE, Tate DF. Physical activity and weight loss: does prescribing higher physical activity goals improve outcome? *Am J Clin Nutr* 2003;78(4):684–9.
75. Kanders BS, Ullmann-Joy P, Foreyt JP, et al. The black American lifestyle intervention (BALI): the design of a weight loss program for working-class African-American women. *J Am Diet Assoc* 1994;94(3):310–2.

76. Latimer AE, Rench TA, Rivers SE, et al. Promoting participation in physical activity using framed messages: An application of prospect theory. *Br J Health Psychol* 2008;13(Pt 4):659–81.
77. Martinson BC, Crain AL, Sherwood NE, Hayes M, Pronk NP, O'Connor P J. Maintaining physical activity among older adults: Six-month outcomes of the Keep Active Minnesota randomized controlled trial. *Prev Med* 2008;46(2):111–9.
78. Miller YD, Trost SG, Brown WJ. Mediators of physical activity behavior change among women with young children. *Am J Prev Med* 2002;23(2S):S98–S103.
79. Mutrie N, Carney C, Blamey A, Crawford F, Aitchison T, Whitelaw A. “Walk in to Work Out”: a randomised controlled trial of a self help intervention to promote active commuting. *J Epidemiol Community Health* 2002;56(6):407–12.
80. Opdenacker J, Boen F, Coorevits N, Delecluse C. Effectiveness of a lifestyle intervention and a structured exercise intervention in older adults. *Prev Med* 2008;46(6):518–24.
81. Opdenacker J, Boen F, Vanden Auweele Y, De Bourdeaudhuij I. Effectiveness of a lifestyle physical activity intervention in a women’s organization. *J Womens Health (Larchmt)* 2008;17(3):413–21.
82. Pazoki R, Nabipour I, Seyednezami N, Imami SR. Effects of a community-based healthy heart program on increasing healthy women’s physical activity: a randomized controlled trial guided by community-based participatory research (CBPR). *BMC Public Health* 2007;7(1):216.
83. Renaud L, Kishchuk N, Juneau M, Nigam A, Téreault K, Leblanc MC. Implementation and outcomes of a comprehensive worksite health promotion program. *Can J Public Health* 2008;99(1):73–7.
84. Sherman BJ, Gilliland G, Speckman JL, Freund KM. The effect of a primary care exercise intervention for rural women. *Prev Med* 2007;44(3):198–201.
85. Simkin-Silverman LR, Wing RR, Boraz MA, Kuller LH. Lifestyle intervention can prevent weight gain during menopause: results from a 5-year randomized clinical trial. *Ann Behav Med* 2003;26(3):212–20.
86. Steele R, Mummery WK, Dwyer T. Using the Internet to promote physical activity: a randomized trial of intervention delivery modes. *J Phys Act Health* 2007;4(3):245–60.
87. Thomas L, Williams M. Promoting physical activity in the workplace: using pedometers to increase daily activity levels. *Health Promot J Austr* 2006;17(2):97–102.
88. Whitt-Glover MC, Hogan PE, Lang W, Heil DP. Pilot study of a faith-based physical activity program among sedentary blacks. *Prev Chronic Dis* 2008;5(2):A51.
89. Wilbur J, McDevitt JH, Wang E, et al. Outcomes of a home-based walking program for African-American women. *Am J Health Promot* 2008;22(5):307–17.
90. Ridgers ND, Stratton G, Fairclough SJ, Twisk JW. Long-term effects of playground markings and physical structures on children’s recess physical activity levels. *Prev Med* 2007;44(5):393–7.
91. Stratton G, Mullan E. The effect of multicolor playground markings on children’s physical activity level during recess. *Prev Med* 2005;41(5–6):828–33.
92. Verstraete SJM, Cardon GM, De Clercq DLR, De Bourdeaudhuij IMM. Increasing children’s physical activity levels during recess periods in elementary schools: the effects of providing game equipment. *Eur J Public Health* 2006;16(4):415–19.
